# Supplementary material for: A one-pot method for the enhanced production of xylitol directly from hemicellulose (corncob xylan)
Source: Royal Society of Chemistry journal article supplement (doi:10.1039/c6ra19666g), 2016-01-01
Supplement: c6ra19666g1.pdf [file c6ra19666g1.pdf]

**Electronic Supplementary Information (ESI):**

**A one-pot method for the enhanced production of xylitol directly from hemicellulose (corn cob xylan)**

Lucília S. Ribeiro<sup>a</sup>, Juan J. Delgado<sup>b</sup>, José J. de Melo Órfão<sup>a</sup> and Manuel Fernando Ribeiro Pereira<sup>a,\*</sup>

<sup>a</sup>*Laboratório de Processos de Separação e Reação - Laboratório de Catálise e Materiais (LSRE-LCM), Departamento de Engenharia Química, Faculdade de Engenharia, Universidade do Porto, Rua Dr. Roberto Frias, 4200-465 Porto, Portugal*

<sup>b</sup>*Departamento de Ciencia de los Materiales e Ingeniería Metalúrgica y Química Inorgánica, Facultad de Ciencias, Universidad de Cádiz, Campus Río San Pedro, 11510 Puerto Real, Cádiz, Spain*

lucilia@fe.up.pt, juanjose.delgado@uca.es, jjmo@fe.up.pt, fpereira@fe.up.pt\*

*\*Corresponding author:*

*Manuel Fernando Ribeiro Pereira*

*Tel. +351 225 081 468*

*Fax: +351 225 081 449*

Characterization results:

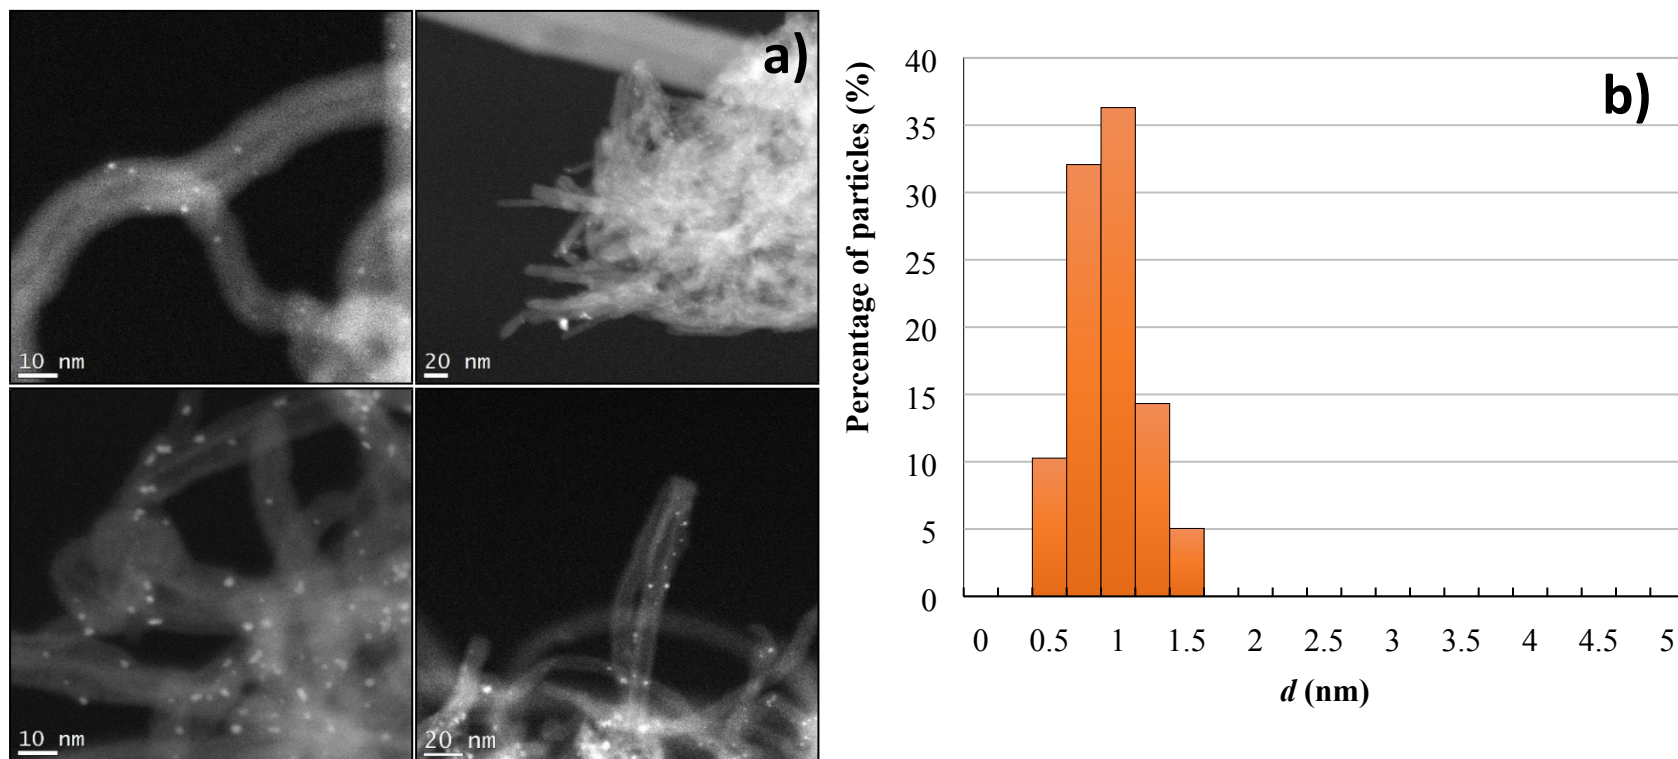

Figure S1 – TEM images (a) and ruthenium particle size distribution on 0.4%Ru/CNT (b).

Transmission electron microscopy (TEM) micrographs were obtained using a JEOL2010F instrument, with 0.19 nm spatial resolution at Scherzer defocus conditions. High Angel Annular Dark Field-Scanning Transmission Electron Microscopy (HAADF-STEM) images were obtained with the

same microscope. From the images, around 250 ruthenium nanoparticles were measured and the average diameter was calculated by

$$d_M = \frac{\sum d_i n_i}{\sum n_i}, \text{ where } n_i \text{ is the number of particles with diameter } d_i.$$

### Reaction results:

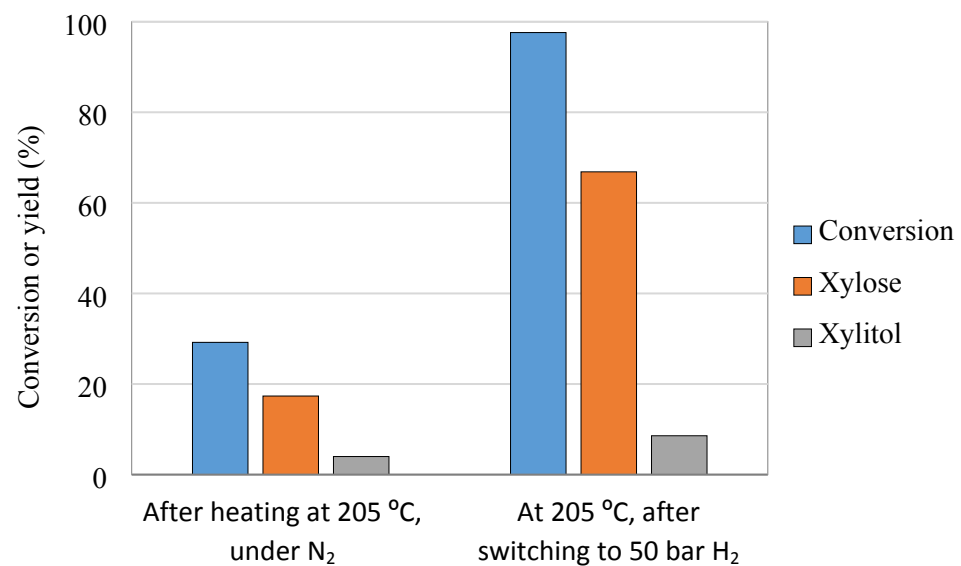

*Figure S2 – Conversion of xylan and yields of xylose and xylitol after heating to 205 °C before and after introduction of H<sub>2</sub>. Reaction conditions: xylan (0.75 g), water (300 mL), 0.4%Ru/CNT (0.3 g), 205 °C, 150 rpm.*
